# Supplementary material for: Whole-Genome Sequencing of a Family with Hereditary Pulmonary Alveolar Proteinosis Identifies a Rare Structural Variant Involving CSF2RA/CRLF2/IL3RA Gene Disruption
Source: PubMed Central journal article supplement (PMC5324064; doi:10.1038/srep43469), 2017-02-24
Supplement: srep43469-s1.pdf [file srep43469-s1.pdf]

## **Supplementary information**

### **Whole-Genome Sequencing of a Family with Hereditary Pulmonary Alveolar Proteinosis Identifies a Rare Structural Variant Involving *CSF2RA/CRLF2/IL3RA***

#### **Gene Disruption**

Chih-Yung Chiu, Shih-Chi Su, Wen-Lang Fan, Shen-Hao Lai, Ming-Han Tsai,

Shih-Hsiang Chen, Kin-Sun Wong & Wen-Hung Chung

Correspondence and requests for materials should be addressed to  
K.-S.W. (email: pchest@adm.cgmh.org.tw) or W.-H.C. (email: chung1@cgmh.org.tw)

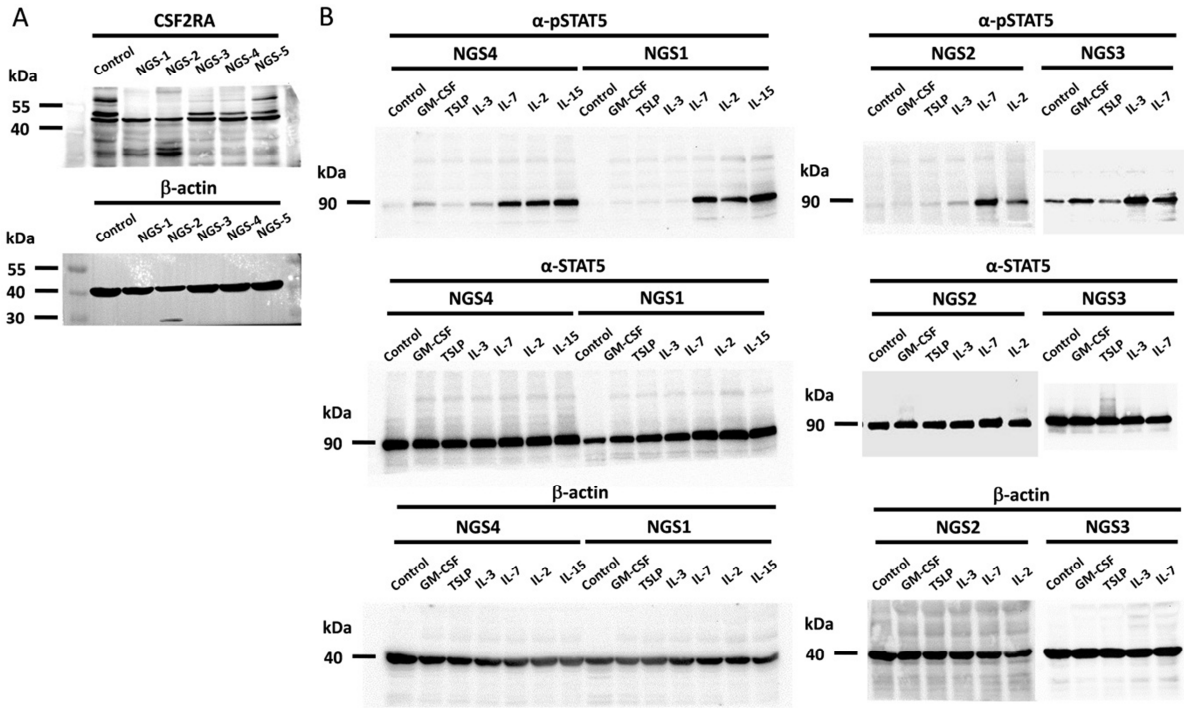

Supplementary Figure S1. Full-length blots/gels for Figure 1E (A) and Figure 3C (B).

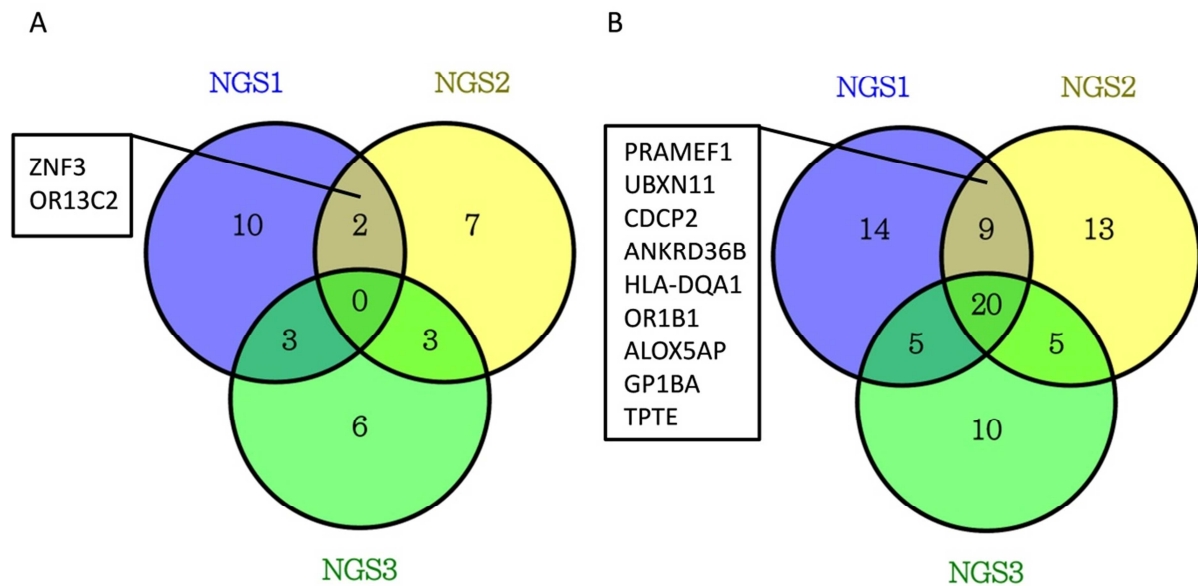

**Supplementary Figure S2. Venn diagrams indicate the number of filtered candidates at homozygous (A) and compound heterozygous (B) states.** To identify autosomal or sex-linked recessive mutations that inactivate (truncate) the gene product, we considered ANNOVAR-annotated variants with the following criteria: (1) loss-of-function: splicing, stop-loss/-gain, and frameshift variants (variant calls in tandem repeat regions obtained from the UCSC Genome Browser were excluded); (2) minor allele frequency (MAF) < 1%: The MAF annotations used included data from two different populations of the 1000 Genomes Project and the ExAC dataset (EAS and SAS), and a panel of 267 germline DNA samples (Chang Gung Human Database, an unpublished whole-genome database of normal controls); (3) exclusion of potential false-positive calls: we visualized the sequencing reads surrounding the remaining variants using the Integrative Genomics Viewer (IGV) to improve the accuracy of variant filtering since detection of variants within segmental duplication region is more challenging. After filtering, homozygous mutations of 48 and 47 genes were identified in the proband and his asymptomatic brother, respectively. Among these candidates, 2 genes were detected in both the proband and his asymptomatic brother but not in the normal sister. Moreover, compound heterozygous mutations of 48 and 47 genes were recovered in the proband and his asymptomatic brother, respectively, with 9 genes being shared in both the proband and his asymptomatic brother but not in the normal sister. Although these genes appeared to be not directly related to PAP, *GP1BA* gene has been functionally implicated in bacterial clearance and protecting hosts from pathogen infections (Wong et al, Nat Immunol 2013; 14: 785-92), while *ALOX5AP* gene polymorphisms have been shown to be associated with asthma and allergy (Holloway et al, Allergy 2008; 63:1046-53), which may partially explain the differential manifestation of PAP in the family.

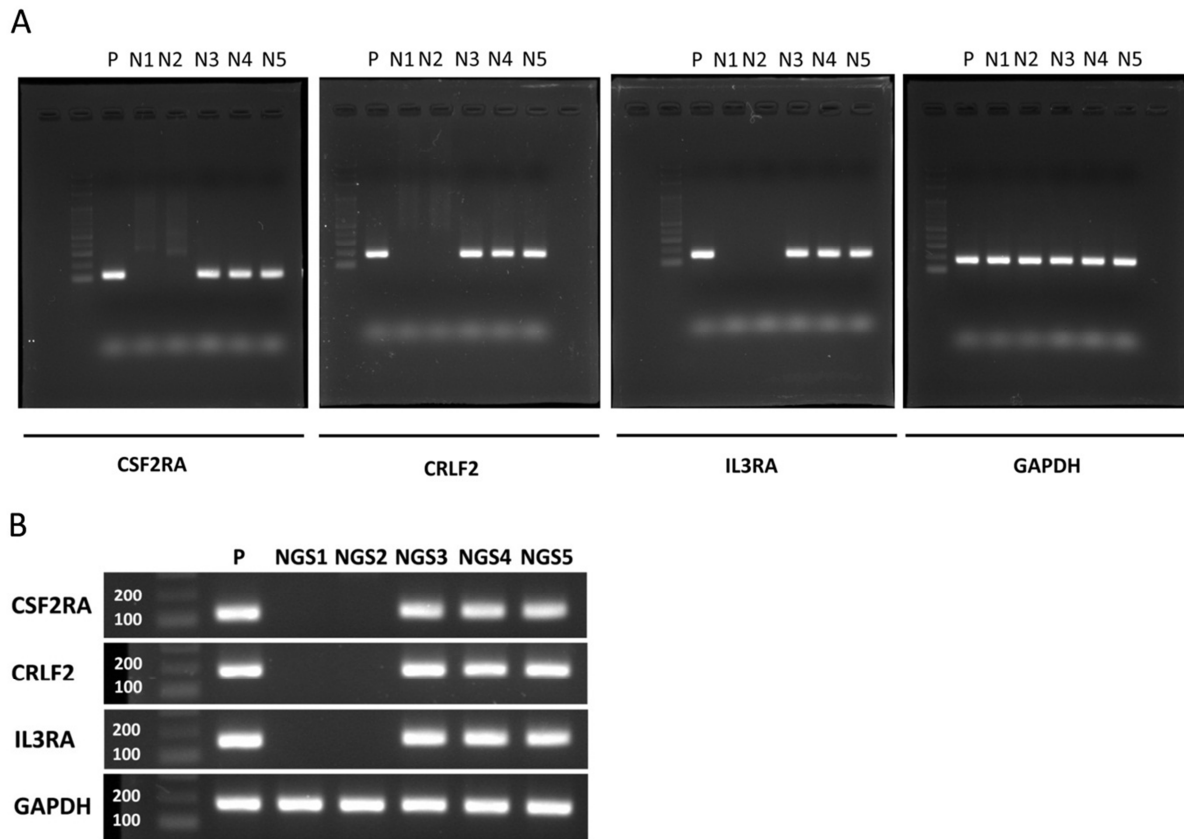

**Supplementary Figure S3. Full-length blots/gels for RT-PCR (A). Agarose gel electrophoresis revealed the absence of PCR products obtained from *CSF2RA*, *CRLF2*, and *IL3RA* genes in NGS1 and NGS2 (B).**

**Supplementary Table S1. Statistics of variant filtering.**

| <b>Autosomal recessive model</b>      |           |           |           |                         |
|---------------------------------------|-----------|-----------|-----------|-------------------------|
| <b>Homozygous mutation</b>            |           |           |           |                         |
|                                       | NGS1      | NGS2      | NGS3      | (NGS1 $\cap$ NGS2)-NGS3 |
| SNP (Variant Level)                   | 178,344   | 168,081   | 165,584   |                         |
| Indel (Variant Level)                 | 27,826    | 26,420    | 26,324    |                         |
| Filtered SNP (Variant Level)          | 9         | 4         | 3         | 0                       |
| Filtered Indel (Variant Level)        | 7         | 12        | 13        | 0                       |
| Filtered SNP+Indel (Gene Level)       | 15        | 12        | 12        | 2                       |
| <b>Compound heterozygous mutation</b> |           |           |           |                         |
|                                       | NGS1      | NGS2      | NGS3      | (NGS1 $\cap$ NGS2)-NGS3 |
| SNP (Variant Level)                   | 1,910,287 | 1,949,575 | 1,983,453 |                         |
| Indel (Variant Level)                 | 298,055   | 315,890   | 319,807   |                         |
| Filtered SNP (Variant Level)          | 119       | 135       | 130       | 27                      |
| Filtered Indel (Variant Level)        | 203       | 206       | 205       | 37                      |
| Filtered SNP+Indel (Gene Level)       | 48        | 47        | 40        | 9                       |

Filter conditions included stopgain, stoploss, frameshift and splicing. Abbreviations: SNP, single nucleotide polymorphism; Indel, insertion and deletion.

**Supplementary Table S2. KEGG and Enrichment of GO BP annotations for 21 genes identified in all three subjects and 63 genes identified just in NGS2 and NGS3 rather than NGS1.**

| Category                    | Term                                            | Count | %      | P Value  | Genes                                                                                                                                        | List Total | Pop Hits | Pop Total | Fold Enrichment | FDR       |
|-----------------------------|-------------------------------------------------|-------|--------|----------|----------------------------------------------------------------------------------------------------------------------------------------------|------------|----------|-----------|-----------------|-----------|
| <b>21 genes</b>             |                                                 |       |        |          |                                                                                                                                              |            |          |           |                 |           |
| <b>Annotation Cluster 1</b> | <b>Enrichment Score: 3.975</b>                  |       |        |          |                                                                                                                                              |            |          |           |                 |           |
| GOTERM_BP_FAT               | GO:0006935~chemotaxis                           | 7     | 4.375  | 1.81E-08 | CXCL1, CCL20, CXCL2, CCR2, FPR3, CXCR2, PLAU                                                                                                 | 17         | 160      | 13528     | 34.815          | 2.59E-05  |
| GOTERM_BP_FAT               | GO:0042330~taxis                                | 7     | 4.375  | 1.81E-08 | CXCL1, CCL20, CXCL2, CCR2, FPR3, CXCR2, PLAU                                                                                                 | 17         | 160      | 13528     | 34.815          | 2.59E-05  |
| GOTERM_BP_FAT               | GO:0006954~inflammatory response                | 8     | 5.000  | 4.11E-08 | CXCL1, NFKBIZ, CCL20, HMOX1, CXCL2, CCR2, CXCR2, IL1A                                                                                        | 17         | 325      | 13528     | 19.588          | 5.90E-05  |
| GOTERM_BP_FAT               | GO:0009611~response to wounding                 | 9     | 5.625  | 5.14E-08 | CXCL1, NFKBIZ, CCL20, HMOX1, CXCL2, CCR2, CXCR2, PLAU, IL1A                                                                                  | 17         | 530      | 13528     | 13.513          | 7.36E-05  |
| GOTERM_BP_FAT               | GO:0007626~locomotory behavior                  | 7     | 4.375  | 4.41E-07 | CXCL1, CCL20, CXCL2, CCR2, FPR3, CXCR2, PLAU                                                                                                 | 17         | 274      | 13528     | 20.330          | 6.33E-04  |
| GOTERM_BP_FAT               | GO:0007610~behavior                             | 8     | 5.000  | 5.02E-07 | CXCL1, PTGS2, CCL20, CXCL2, CCR2, FPR3, CXCR2, PLAU                                                                                          | 17         | 469      | 13528     | 13.574          | 7.20E-04  |
| GOTERM_BP_FAT               | GO:0006952~defense response                     | 8     | 5.000  | 3.10E-06 | CXCL1, NFKBIZ, CCL20, HMOX1, CXCL2, CCR2, CXCR2, IL1A                                                                                        | 17         | 615      | 13528     | 10.351          | 0.004     |
| KEGG_PATHWAY                | hsa04060:Cytokine-cytokine receptor interaction | 7     | 4.375  | 6.56E-06 | CXCL1, TNFRSF10C, CCL20, CXCL2, CCR2, CXCR2, IL1A                                                                                            | 12         | 262      | 5085      | 11.322          | 0.005     |
| <b>63 genes</b>             |                                                 |       |        |          |                                                                                                                                              |            |          |           |                 |           |
| <b>Annotation Cluster 1</b> | <b>Enrichment Score: 6.678</b>                  |       |        |          |                                                                                                                                              |            |          |           |                 |           |
| GOTERM_BP_FAT               | GO:0009611~response to wounding                 | 22    | 36.667 | 2.83E-16 | IRAK2, IL6, CCL3, TNF, PLEK, ADORA2A, CXCL3, IL1RN, CXCR1, CCL4L2, NLRP3, CCL4, SOD2, CD163, ORM1, TNFAIP6, EREG, ADM, F3, IL1B, ORM2, PTAFR | 55         | 530      | 13528     | 10.210          | 5.440E-13 |
| GOTERM_BP_FAT               | GO:0006954~inflammatory response                | 18    | 30.000 | 4.14E-15 | IRAK2, CCL3, IL6, TNF, ADORA2A, CXCL3, IL1RN, CXCR1, CCL4L2, NLRP3, CCL4, CD163, ORM1, TNFAIP6, F3, IL1B, ORM2, PTAFR                        | 55         | 325      | 13528     | 13.623          | 6.650E-12 |
| GOTERM_BP_FAT               | GO:0006952~defense response                     | 19    | 31.667 | 1.13E-11 | IRAK2, IL6, CCL3, TNF, ADORA2A, NCF1, CXCL3, IL1RN, CXCR1, CCL4L2, NLRP3, CCL4, CD163, ORM1, TNFAIP6, F3, IL1B, ORM2, PTAFR                  | 55         | 615      | 13528     | 7.599           | 1.823E-08 |
| GOTERM_BP_FAT               | GO:0006955~immune response                      | 18    | 30.000 | 7.05E-10 | ICAM1, IL1R2, IL6, CCL3, NBN, TNF, AQP9, NCF1, CXCL3, IL1RN, TNFSF15, CCL4L2, NLRP3, CCL4, CLEC4E, CD274, IL1B, PTAFR                        | 55         | 690      | 13528     | 6.416           | 1.140E-06 |

|                             |                                                     |    |        |          |                                                                   |    |     |       |        |       |
|-----------------------------|-----------------------------------------------------|----|--------|----------|-------------------------------------------------------------------|----|-----|-------|--------|-------|
| GOTERM_BP_FAT               | GO:0007626~locomotory behavior                      | 10 | 16.667 | 1.20E-06 | CCL3, IL6, ADORA2A, CXCL3, CXCR1, IL1B, CCL4L2, CCL4, PTAFR, SOD2 | 55 | 274 | 13528 | 8.977  | 0.002 |
| GOTERM_BP_FAT               | GO:0006935~chemotaxis                               | 8  | 13.333 | 3.15E-06 | CCL3, IL6, CXCL3, CXCR1, IL1B, CCL4L2, CCL4, PTAFR                | 55 | 160 | 13528 | 12.298 | 0.005 |
| GOTERM_BP_FAT               | GO:0042330~taxis                                    | 8  | 13.333 | 3.15E-06 | CCL3, IL6, CXCL3, CXCR1, IL1B, CCL4L2, CCL4, PTAFR                | 55 | 160 | 13528 | 12.298 | 0.005 |
| KEGG_PATHWAY                | hsa04060:Cytokine-cytokine receptor interaction     | 10 | 16.667 | 1.65E-05 | IL1R2, CCL3, IL6, TNF, CXCL3, TNFSF15, CXCR1, IL1B, CCL4L2, CCL4  | 32 | 262 | 5085  | 6.065  | 0.017 |
| <b>Annotation Cluster 2</b> | <b>Enrichment Score: 2.576</b>                      |    |        |          |                                                                   |    |     |       |        |       |
| GOTERM_BP_FAT               | GO:0002237~response to molecule of bacterial origin | 7  | 11.667 | 1.12E-06 | IL6, ADM, SOCS3, NFKBIA, IL1B, IRG1, PTAFR                        | 55 | 86  | 13528 | 20.020 | 0.002 |
| GOTERM_BP_FAT               | GO:0009617~response to bacterium                    | 8  | 13.333 | 1.08E-05 | IL6, TNF, ADM, SOCS3, NFKBIA, IL1B, IRG1, PTAFR                   | 55 | 193 | 13528 | 10.195 | 0.018 |
| GOTERM_BP_FAT               | GO:0032496~response to lipopolysaccharide           | 6  | 10.000 | 1.33E-05 | ADM, SOCS3, NFKBIA, IL1B, IRG1, PTAFR                             | 55 | 77  | 13528 | 19.166 | 0.022 |

Pathways were identified by DAVID Functional Annotation and selected by using a FDR adjusted *P* value < 0.05. Abbreviations: KEGG, Kyoto Encyclopedia of Genes and Genomes; GO, Gene Ontology; BP, biological process.
